# Supplementary material
Source: PubMed Central journal article supplement (PMC10782859)
Supplement: NIHMS1928020-supplement-Supp_Materials.pdf [file NIHMS1928020-supplement-Supp_Materials.pdf]

## 1 Supplementary Method S1

### 1.1 Skip-gram

Formally, given a graph  $G = (V, E)$  where  $V$  is a set of vertices (also known as nodes), and  $E$  is a set of paired vertices (also known as edges), let  $f$  be the mapping between each node  $v \in V$  to its feature representation of size  $d$  where  $f: V \rightarrow \mathbb{R}^d$ . Here,  $d$  is a parameter that defines the dimension of the feature representation. For each node  $v \in V$ ,  $N_s(v) \subset V$  is a neighborhood with sampling strategy  $S$ , and the objective function maximizes the log-probability of reconstructing this neighborhood. Formally defined as:

$$\max_f \sum_{u \in V} \log P(N_s(u)|f(u)). \quad (S1)$$

Two assumptions are made to solve the optimization problem presented in [Equation S1](#) in polynomial time. First, the likelihood of observing a neighborhood node is independent of observing any other neighborhood node given the source node's feature representation, as:

$$P(N_s(u)|f(u)) = \prod_{v \in N_s(u)} P(v|f(u)). \quad (S2)$$

Second, a source node and neighbor node have a symmetric effect over each other; thus, their probabilities can be parameterized as the Softmax normalized inner product and can be written as:

$$P(v|f(u)) = \frac{\exp(f(v) \cdot f(u))}{\sum_{x \in V} \exp(f(x) \cdot f(u))}. \quad (S3)$$

The objective function presented in [Equation S1](#) can be simplified with the conditional independence assumption and parameterization of the probabilities introduced in [1] as follows:

$$\max_f \sum_{u \in V} (-\log Z_u + \sum_{v \in N_s(u)} f(v) \cdot f(u)). \quad (S4)$$

Calculating the partition function for each node,  $Z_u = \sum_{x \in V} \exp(f(x) \cdot f(u))$ , is not practical, especially for larger networks.

In Node2Vec, they approximate the objective function using the negative sampling algorithm introduced in Mikolov et al., 2013 [2]. Instead of calculating the probability of co-occurrence of all node pairs, the negative sampling algorithm attempts to increase the co-occurrence probability of the sample node with its neighbors and decrease that probability with  $k$  randomly selected nodes from the graph.

The simplified objective function presented in [Equation S4](#) can then find the d-dimensional representation of each node by employing the sampling strategy  $S$  and running Skip-gram with negative sampling.

Although Skip-gram revolutionized applications of NLP, it has two main drawbacks. (1) Skip-gram cannot capture polysemy, a word with multiple meanings, since it represents each word as a single vector. (2) It fails to identify compound word phrases. For example, the word “ice cream” should have a different representation than the words “ice” and “cream.” As we use the HPO terms as a representation of phenotypic terms in our phenotype embedding method, we do not face the aforementioned drawbacks.

## 1.2 Sampling strategy

The Skip-gram model was developed for inputs of text, where a neighborhood of a word is a sliding window on its surrounding words in unstructured text. In order to make graph structures amenable to the Skip-gram model, Node2Vec introduces a biased randomized procedure that samples neighborhoods for each given node. Unlike previous studies such as [3], where the transition probability to the next node,  $v_n$ , only depends on the current node,  $v_c$ , i.e.,  $P(v_n|v_c)$ , in a biased random walk the transition probability depends on both the current and the previous node,  $v_p$ , i.e.,  $P(v_n|v_c, v_p)$ , formally defined as:

$$P(v_n|v_c, v_p) = \begin{cases} \frac{\alpha_{pq}(v_p, v_n)w(v_c, v_n)}{\sum_{v \in N(v)} \alpha_{pq}(v_p, v)w(v_c, v)} & \text{if } (v_c, v_n) \in E \\ 0 & \text{otherwise} \end{cases}, \quad (\text{S5})$$

where  $w(u, v)$  represents the edge weight between nodes  $u$  and  $v$ ,  $N(v)$  represents the sampled neighborhood for node  $v$ , and the bias factor  $\alpha_{pq}$  is defined as:

$$\alpha_{pq}(v_p, v_n) = \begin{cases} \frac{1}{p} & \text{if } v_p = v_n \\ 1 & \text{if } v_p \neq v_n, (v_p, v_n) \in E \\ \frac{1}{q} & \text{if } v_p \neq v_n, (v_p, v_n) \notin E \end{cases}. \quad (\text{S6})$$

Parameter  $p$  controls the likelihood of immediately revisiting a node in a biased random walk, where larger values,  $> \max(q, 1)$ , encourage exploration in the graph. On the other hand, parameter  $q$  controls the exploitation criteria where larger values,  $> 1$ , bias the random walk towards nodes that are closer to the previous node,  $v_p$ .

In the case of a weak connection between nodes  $v_p$  and  $v_n$ , i.e.,  $0 < w(v_p, v_n) \leq 1$ , Node2Vec considers it a normal connection with a bias factor of 1 rather than  $1/q$ . This case shows that Node2Vec does not discriminate weak connections from stronger ones and could not detect cases where the potential next node has a loose connection with the previous node.

## 2 Supplementary Method S2

### 2.1 Example of HPO embedding of phenotypic terms

*Generalized-onset seizure (HP:0002197)* and *Motor seizure (HP:0020219)* are represented as the children of *Seizure (HP:0001250)* in the HPO with a cumulative frequency of 0.0134 and 0.1755, respectively, in our corpus. These frequencies imply a stronger connection between *Seizure (HP:0001250)* and *Motor seizure (HP:0020219)* than *Seizure (HP:0001250)* and *Generalized-onset seizure (HP:0002197)*, which could be captured by our weighting mechanism.

Furthermore, *Generalized-onset seizure (HP:0002197)* has two children, *Generalized non-motor (absence) seizure (HP:0002121)*, with a frequency of 0.0057, and *Generalized-onset motor seizure (HP:0032677)*, with a frequency of 0.0079, which is also a child of *Motor seizure (HP:0020219)*. *Epileptic spasm (HP:0011097)* is another child of *Motor seizure (HP:0020219)* with the frequency of 0.1685, which indicates a more robust representation of this phenotype in our corpus.

Based on the frequency of these nodes, *Motor seizure (HP:0020219)*'s connection is much stronger to its parent, *Seizure (HP:0001250)*, implying generalization in phenotypic concepts, with  $w = 0.1773$ , than to either of its children, implying specialization in phenotypic concepts, with  $w$  equal to 0.1702 and 0.0096 (**Figure 3**).

These weights suggest placing *Motor seizure (HP:0020219)* and *Seizure (HP:0001250)* closer in the embedding space, resulting in a higher similarity value than *Motor seizure (HP:0020219)* to either of its children, *Epileptic spasm (HP:0011097)* or *Generalized-onset motor seizure (HP:0002197)*. The similarity values align with these suggestions and are marked in gray in **Figure 3**.

### 3 Supplementary Figure S1

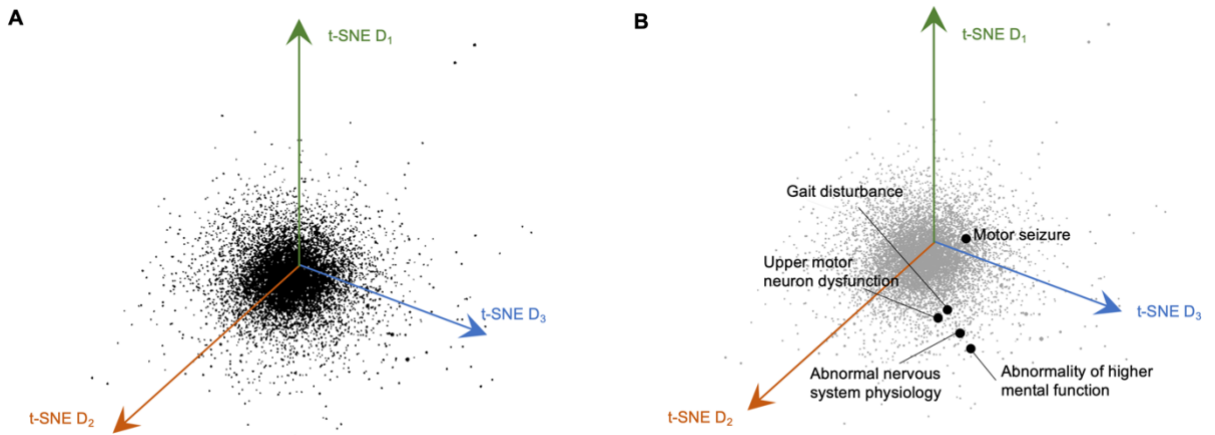

**Figure S1.** The HPO can be represented in a lower-dimensional space using the t-SNE algorithm, where similarities and differences between the phenotypes are preserved. **(A)** A 3D representation of all phenotypes in the embedding space using the t-SNE algorithm with 32 iterations. The axes are based on the first three t-SNE dimensions. We can see a change in the 3D representation compared to PCA 3D space (Figure 5). **(B)** The five closest phenotypes to *Seizure* (*HP:0001250*) are marked in the 3D space. While the closest phenotypes in PCA 3D space and t-SNE 3D space match, t-SNE requires hyper-parameter tuning, making it more costly compared to PCA.

## 4 Supplementary Figure S2

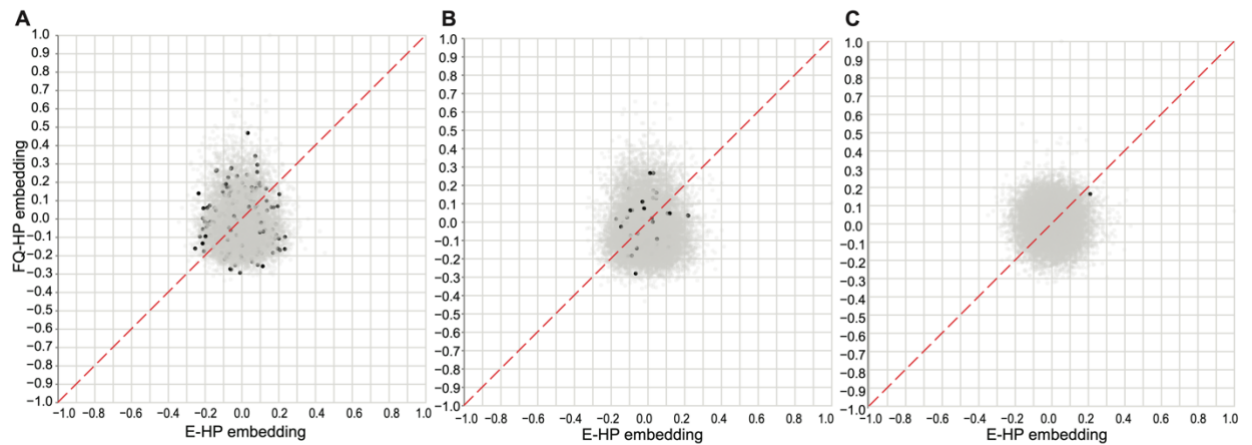

**Figure S2. Different patterns of the cosine similarity value change using the E-HP and FQ-HP embedding.** Pair-wise cosine similarity changes between a reference phenotype, **(A)** *Seizure* (HP:0001250), **(B)** *Neurodevelopmental abnormality* (HP:0012759), and **(C)** *Infantile spasms* (HP:0012469), with all other phenotypes in the HPO using the FQ-HP and E-HP embedding methods. Points marked in black represent the cosine similarity values with phenotypes that are descendants of the reference phenotype. Points marked in grey are the cosine similarity values of non-descendant phenotypes.

## 5 Supplementary Method S3

We formally define Info Score as,

$$\text{Info Score}(m, \tau_1, \tau_2) = \frac{P_{99}(\tau_1) - P_1(\tau_1)}{P_{99}(\tau_2) - P_1(\tau_2)}, \quad (S7)$$

where  $m$  is the main phenotype, and  $P_k(\tau)$  is the  $k^{\text{th}}$  percentile of the pair-wise similarity values between  $m$  and all other phenotypes using the embedding technique  $\tau$ . See Y and X in [Figure 6](#) representing the numerator and denominator of [Equation S7](#) with  $\tau_1 = \text{FQ-HP}$  and  $\tau_2 = \text{E-HP}$ , respectively. If the Info Score is very close to 1, there is no significant change in the cosine similarity values using the method  $\tau_1$  over  $\tau_2$ . However, as an Info Score moves toward values smaller or greater than 1, it shows a significant change in the cosine similarity values and vector representations of the phenotypes.

## 6 Supplementary Table S1

| #  | Scenario | Reference HPO | Reference Name                                   | Candidate1 HPO | Candidate1 Name                          | Candidate2 HPO | Candidate2 Name                          |
|----|----------|---------------|--------------------------------------------------|----------------|------------------------------------------|----------------|------------------------------------------|
| 1  | S1       | HP:0000708    | Behavioral abnormality                           | HP:0007018     | Attention deficit hyperactivity disorder | HP:0000736     | Short attention span                     |
| 2  | S1       | HP:0012638    | Abnormal nervous system physiology               | HP:0007185     | Loss of consciousness                    | HP:0011443     | Abnormality of coordination              |
| 3  | S1       | HP:0002011    | Morphological central nervous system abnormality | HP:0001287     | Meningitis                               | HP:0012503     | Abnormality of the pituitary gland       |
| 4  | S1       | HP:0012443    | Abnormality of brain morphology                  | HP:0100659     | Abnormality of the cerebral vasculature  | HP:0002060     | Abnormal cerebral morphology             |
| 5  | S1       | HP:0009830    | Peripheral neuropathy                            | HP:0000763     | Sensory neuropathy                       | HP:0007021     | Pain insensitivity                       |
| 6  | S1       | HP:0001257    | Spasticity                                       | HP:0002313     | Spastic paraparesis                      | HP:0006983     | Slowly progressive spastic quadriparesis |
| 7  | S1       | HP:0100852    | Abnormal fear/anxiety-related behavior           | HP:0000740     | Episodic paroxysmal anxiety              | HP:0025253     | Claustrophobia                           |
| 8  | S1       | HP:0012443    | Abnormality of brain morphology                  | HP:0002139     | Arrhinencephaly                          | HP:0002951     | Partial absence of cerebellar vermis     |
| 9  | S1       | HP:0100851    | Abnormal emotion/affect behavior                 | HP:0040082     | Happy demeanor                           | HP:0031588     | Unhappy demeanor                         |
| 10 | S1       | HP:0009830    | Peripheral neuropathy                            | HP:0007267     | Chronic axonal neuropathy                | HP:0002495     | Impaired vibratory sensation             |
| 11 | S2       | HP:0001289    | Confusion                                        | HP:0031258     | Delirium                                 | HP:0002060     | Abnormal cerebral morphology             |
| 12 | S2       | HP:0002315    | Headache                                         | HP:0002076     | Migraine                                 | HP:0100033     | Tics                                     |
| 13 | S2       | HP:0011446    | Abnormality of higher mental function            | HP:0031258     | Delirium                                 | HP:0001297     | Stroke                                   |
| 14 | S2       | HP:0011446    | Abnormality of higher mental function            | HP:0002464     | Spastic dysarthria                       | HP:0012444     | Brain atrophy                            |
| 15 | S2       | HP:0009830    | Peripheral neuropathy                            | HP:0003477     | Peripheral axonal neuropathy             | HP:0040148     | Cortical myoclonus                       |
| 16 | S3       | HP:0012759    | Neurodevelopmental abnormality                   | HP:0001297     | Stroke                                   | HP:0000763     | Sensory neuropathy                       |
| 17 | S3       | HP:0012638    | Abnormal nervous system physiology               | HP:0030692     | Brain neoplasm                           | HP:0100006     | Neoplasm of the central nervous system   |
| 18 | S3       | HP:0100852    | Abnormal fear/anxiety-related behavior           | HP:0000613     | Photophobia                              | HP:0002870     | Obstructive sleep apnea                  |
| 19 | S3       | HP:0003269    | Sudanophilic leukodystrophy                      | HP:0012164     | Asterixis                                | HP:0025454     | Abnormal CSF metabolite level            |
| 20 | S3       | HP:0004372    | Reduced consciousness/confusion                  | HP:0007029     | Cerebral berry aneurysm                  | HP:0010830     | Impaired tactile sensation               |



| #  | Scenario | Reference HPO | Reference Name                                   | Candidate1 HPO | Candidate1 Name                                        | Candidate2 HPO | Candidate2 Name                                     |
|----|----------|---------------|--------------------------------------------------|----------------|--------------------------------------------------------|----------------|-----------------------------------------------------|
| 21 | S4       | HP:0100851    | Abnormal emotion/affect behavior                 | HP:0031589     | Suicidal ideation                                      | HP:0000737     | Irritability                                        |
| 22 | S4       | HP:0009830    | Peripheral neuropathy                            | HP:0003401     | Paresthesia                                            | HP:0003474     | Sensory impairment                                  |
| 23 | S4       | HP:0001288    | Gait disturbance                                 | HP:0040083     | Toe walking                                            | HP:0031955     | Antalgic gait                                       |
| 24 | S4       | HP:0012638    | Abnormal nervous system physiology               | HP:0001308     | Tongue fasciculations                                  | HP:0004372     | Reduced consciousness/confusion                     |
| 25 | S4       | HP:0011446    | Abnormality of higher mental function            | HP:0032588     | Hand apraxia                                           | HP:0004372     | Reduced consciousness/confusion                     |
| 26 | S5       | HP:0002011    | Morphological central nervous system abnormality | HP:0001264     | Spastic diplegia                                       | HP:0012447     | Abnormal myelination                                |
| 27 | S5       | HP:0002527    | Falls                                            | HP:0001289     | Confusion                                              | HP:0001254     | Lethargy                                            |
| 28 | S5       | HP:0001288    | Gait disturbance                                 | HP:0100022     | Abnormality of movement                                | HP:0001257     | Spasticity                                          |
| 29 | S5       | HP:0001289    | Confusion                                        | HP:0002315     | Headache                                               | HP:0012447     | Abnormal myelination                                |
| 30 | S5       | HP:0001276    | Hypertonia                                       | HP:0004372     | Reduced consciousness/confusion                        | HP:0004305     | Involuntary movements                               |
| 31 | S6       | HP:0012651    | Abasia                                           | HP:0008153     | Periodic hypokalemic paresis                           | HP:0010829     | Impaired temperature sensation                      |
| 32 | S6       | HP:0012657    | Abnormal brain positron emission tomography      | HP:0032812     | Neonatal electro-clinical non-motor seizure            | HP:0012082     | Cerebellar Purkinje layer atrophy                   |
| 33 | S6       | HP:0007159    | Fluctuations in consciousness                    | HP:0002536     | Abnormal cortical gyration                             | HP:0010549     | Weakness due to upper motor neuron dysfunction      |
| 34 | S6       | HP:0100660    | Dyskinesia                                       | HP:0012096     | Intracranial epidermoid cyst                           | HP:0002392     | EEG with polyspike wave complexes                   |
| 35 | S6       | HP:0012487    | Cerebellopontine angle arachnoid cyst            | HP:0003380     | Decreased number of peripheral myelinated nerve fibers | HP:0032787     | Focal impaired awareness sensory seizure            |
| 36 | S6       | HP:0000722    | Obsessive-compulsive behavior                    | HP:0010636     | Schizencephaly                                         | HP:0032865     | Myoclonic absence status epilepticus                |
| 37 | S6       | HP:0040197    | Encephalomalacia                                 | HP:0007206     | Hemimegalencephaly                                     | HP:0410014     | Abnormality of ganglion                             |
| 38 | S6       | HP:0012076    | Borderline personality disorder                  | HP:0031947     | Tongue tremor                                          | HP:0011195     | EEG with focal sharp slow waves                     |
| 39 | S6       | HP:0040292    | Left hemiplegia                                  | HP:0031166     | Eyelid myokymia                                        | HP:0045052     | Abnormality of the brachial nerve plexus            |
| 40 | S6       | HP:0002188    | Delayed CNS myelination                          | HP:0012194     | Episodic hemiplegia                                    | HP:0040331     | Focal hypointensity of cerebral white matter on MRI |
| 41 | S6       | HP:0004614    | Spina bifida occulta at S1                       | HP:0006930     | Frontoparietal cortical dysplasia                      | HP:0030221     | Sweet craving                                       |

| #  | Scenario | Reference HPO | Reference Name                          | Candidate1 HPO | Candidate1 Name                                              | Candidate2 HPO | Candidate2 Name                                                 |
|----|----------|---------------|-----------------------------------------|----------------|--------------------------------------------------------------|----------------|-----------------------------------------------------------------|
| 42 | S6       | HP:0006989    | Dysplastic corpus callosum              | HP:0008757     | Unilateral vocal cord paralysis                              | HP:0012046     | Areflexia of upper limbs                                        |
| 43 | S6       | HP:0002549    | Deficit in phonologic short-term memory | HP:0032664     | Adversive status epilepticus                                 | HP:0032821     | Neonatal electro-clinical tonic seizure                         |
| 44 | S6       | HP:0011099    | Spastic hemiparesis                     | HP:3000061     | Abnormality of infra-orbital nerve                           | HP:0007187     | Focal lissencephaly                                             |
| 45 | S6       | HP:0002445    | Tetraplegia                             | HP:0004423     | Cranium bifidum occultum                                     | HP:0006961     | Jerky head movements                                            |
| 46 | S6       | HP:0008757    | Unilateral vocal cord paralysis         | HP:0007375     | Abnormality of the septum pellucidum                         | HP:0032044     | Decreased vigilance                                             |
| 47 | S6       | HP:0011182    | Interictal epileptiform activity        | HP:0010530     | Palatal myoclonus                                            | HP:0030890     | Hyperintensity of cerebral white matter on MRI                  |
| 48 | S6       | HP:0031629    | Impaired tandem gait                    | HP:0032699     | Focal cognitive seizure with dysgraphia/agrap hia            | HP:0032161     | Coccioidial meningitis                                          |
| 49 | S6       | HP:0002352    | Leukoencephalopathy                     | HP:0003398     | Abnormal synaptic transmission at the neuromuscular junction | HP:0032920     | Focal impaired awareness manual automatism seizure              |
| 50 | S6       | HP:0006742    | Congenital neuroblastoma                | HP:0032393     | Diffuse ribbon-like subcortical heterotopia                  | HP:0003009     | Enhanced neurotoxicity of vincristine                           |
| 51 | S6       | HP:0006850    | Hypoplasia of the ventral pons          | HP:0007330     | Frontal encephalocele                                        | HP:0041056     | Hot cross bun sign                                              |
| 52 | S6       | HP:0002282    | Gray matter heterotopia                 | HP:0012228     | Tension-type headache                                        | HP:0007206     | Hemimegalencephaly                                              |
| 53 | S6       | HP:0002524    | Cataplexy                               | HP:0002392     | EEG with polyspike wave complexes                            | HP:0032777     | Focal impaired awareness autonomic seizure with pallor/flushing |
| 54 | S6       | HP:0000762    | Decreased nerve conduction velocity     | HP:0002516     | Increased intracranial pressure                              | HP:0003384     | Peripheral axonal atrophy                                       |
| 55 | S6       | HP:0011097    | Epileptic spasm                         | HP:0000748     | Inappropriate laughter                                       | HP:0011158     | Focal sensory seizure with auditory features                    |
| 56 | S6       | HP:0007105    | Infantile encephalopathy                | HP:0032506     | Alien limb phenomenon                                        | HP:0011749     | Adrenocorticotropic hormone excess                              |
| 57 | S6       | HP:0031843    | Bradyphrenia                            | HP:0006999     | Basal ganglia gliosis                                        | HP:0001305     | Dandy-Walker malformation                                       |
| 58 | S6       | HP:0000745    | Diminished motivation                   | HP:0002070     | Limb ataxia                                                  | HP:0012898     | Abnormal lower-limb motor evoked potentials                     |
| 59 | S6       | HP:0011960    | Substantia nigra gliosis                | HP:0010626     | Anterior pituitary agenesis                                  | HP:0006790     | Cerebral cortex with spongiform changes                         |
| 60 | S6       | HP:0003406    | Peripheral nerve compression            | HP:0031589     | Suicidal ideation                                            | HP:0100316     | Hirano bodies                                                   |

| #  | Scenario | Reference HPO | Reference Name                                               | Candidate1 HPO | Candidate1 Name                                                              | Candidate2 HPO | Candidate2 Name                                                          |
|----|----------|---------------|--------------------------------------------------------------|----------------|------------------------------------------------------------------------------|----------------|--------------------------------------------------------------------------|
| 61 | S6       | HP:0012285    | Abnormal hypothalamus physiology                             | HP:0011178     | Alpha-EEG                                                                    | HP:0031885     | Hyperglycorrhachia                                                       |
| 62 | S6       | HP:0006886    | Impaired distal vibration sensation                          | HP:0002457     | Abnormal head movements                                                      | HP:0007258     | Severe demyelination of the white matter                                 |
| 63 | S6       | HP:0012171    | Stereotypical hand wringing                                  | HP:0003438     | Absent Achilles reflex                                                       | HP:0001325     | Hypoglycemic coma                                                        |
| 64 | S6       | HP:0002200    | Pseudobulbar signs                                           | HP:0032886     | Focal impaired awareness cognitive seizure with expressive dysphasia/aphasia | HP:0001067     | Neurofibromas                                                            |
| 65 | S6       | HP:0012486    | Myelitis                                                     | HP:0011443     | Abnormality of coordination                                                  | HP:0011400     | Abnormal CNS myelination                                                 |
| 66 | S6       | HP:0002313    | Spastic paraparesis                                          | HP:0032771     | Focal autonomic seizure with lacrimation                                     | HP:0030797     | Reduced volume of central subdivision of bed nucleus of stria terminalis |
| 67 | S6       | HP:0002118    | Abnormality of the cerebral ventricles                       | HP:0030202     | Favorable response of weakness to acetylcholine esterase inhibitors          | HP:0011179     | Beta-EEG                                                                 |
| 68 | S6       | HP:0010795    | Cerebellar glioma                                            | HP:0004336     | Myelin outfoldings                                                           | HP:0030708     | Myeloschisis                                                             |
| 69 | S6       | HP:0003388    | Easy fatigability                                            | HP:0045007     | Abnormal substantia nigra morphology                                         | HP:0006960     | Choroid plexus calcification                                             |
| 70 | S6       | HP:0032892    | Infection-related seizure                                    | HP:0011291     | EEG with central sharp slow waves                                            | HP:0001285     | Spastic tetraparesis                                                     |
| 71 | S6       | HP:0025170    | Neuronal/glioneuronal neoplasm of the central nervous system | HP:0009733     | Glioma                                                                       | HP:0011184     | EEG with hyperventilation-induced generalized epileptiform discharges    |
| 72 | S6       | HP:0002323    | Anencephaly                                                  | HP:0002143     | Abnormality of the spinal cord                                               | HP:0032681     | Focal aware cognitive seizure                                            |
| 73 | S6       | HP:0006957    | Loss of ability to walk                                      | HP:0006863     | Severe expressive language delay                                             | HP:0032046     | Focal cortical dysplasia                                                 |
| 74 | S6       | HP:0100565    | Hydromyelia                                                  | HP:0030048     | Colpocephaly                                                                 | HP:0030746     | Intraventricular hemorrhage                                              |
| 75 | S6       | HP:0030858    | Addictive behavior                                           | HP:0012503     | Abnormality of the pituitary gland                                           | HP:0010625     | Anterior pituitary dysgenesis                                            |
| 76 | S6       | HP:0000719    | Inappropriate behavior                                       | HP:0001483     | Eye poking                                                                   | HP:0007027     | Poorly formed metencephalon                                              |
| 77 | S6       | HP:0002511    | Alzheimer disease                                            | HP:0100034     | Motor tics                                                                   | HP:0030217     | Limb apraxia                                                             |
| 78 | S6       | HP:0011167    | Focal tonic seizure                                          | HP:0010829     | Impaired temperature sensation                                               | HP:0020098     | Herpes encephalitis                                                      |
| 79 | S6       | HP:0001335    | Bimanual synkinesia                                          | HP:0005462     | Calcification of falx cerebri                                                | HP:0010528     | Prosopagnosia                                                            |

| #  | Scenario | Reference HPO | Reference Name                          | Candidate1 HPO | Candidate1 Name                                  | Candidate2 HPO | Candidate2 Name                                                                  |
|----|----------|---------------|-----------------------------------------|----------------|--------------------------------------------------|----------------|----------------------------------------------------------------------------------|
| 80 | S6       | HP:0200147    | Neuronal loss in basal ganglia          | HP:0007807     | Optic nerve compression                          | HP:0032801     | Focal impaired awareness<br>cognitive seizure with memory impairment             |
| 81 | S7       | HP:0006846    | Acute encephalopathy                    | HP:0012638     | Abnormal nervous system physiology               | HP:0000707     | Abnormality of the nervous system                                                |
| 82 | S7       | HP:0032267    | Empty delta sign                        | HP:0002143     | Abnormality of the spinal cord                   | HP:0002011     | Morphological central nervous system abnormality                                 |
| 83 | S7       | HP:0002600    | Hyporeflexia of lower limbs             | HP:0001265     | Hyporeflexia                                     | HP:0012638     | Abnormal nervous system physiology                                               |
| 84 | S7       | HP:0002491    | Spasticity of facial muscles            | HP:0002493     | Upper motor neuron dysfunction                   | HP:0011442     | Abnormal central motor function                                                  |
| 85 | S7       | HP:0007206    | Hemimegalencephaly                      | HP:0012443     | Abnormality of brain morphology                  | HP:0000707     | Abnormality of the nervous system                                                |
| 86 | S8       | HP:0500089    | Optic nerve sheath meningioma           | HP:0002011     | Morphological central nervous system abnormality | HP:0010553     | Oculogyric crisis                                                                |
| 87 | S8       | HP:0000750    | Delayed speech and language development | HP:0012759     | Neurodevelopmental abnormality                   | HP:0004423     | Cranium bifidum occultum                                                         |
| 88 | S8       | HP:0011451    | Congenital microcephaly                 | HP:0000252     | Microcephaly                                     | HP:0100703     | Tongue thrusting                                                                 |
| 89 | S8       | HP:0007354    | Amyotrophic lateral sclerosis           | HP:0002011     | Morphological central nervous system abnormality | HP:0030218     | Punding                                                                          |
| 90 | S8       | HP:0007360    | Aplasia/Hypoplasia of the cerebellum    | HP:0002011     | Morphological central nervous system abnormality | HP:0000741     | Apathy                                                                           |
| 91 | S9       | HP:0002372    | Normal interictal EEG                   | HP:0001311     | Abnormal nervous system electrophysiology        | HP:0032689     | Focal cognitive seizure with dissociation                                        |
| 92 | S9       | HP:0040326    | Hypoplasia of the olfactory bulb        | HP:0012639     | Abnormal nervous system morphology               | HP:0032784     | Focal aware autonomic seizure with palpitations/tachycardia/bradycardia/asystole |
| 93 | S9       | HP:0030303    | Hypoplastic anterior commissure         | HP:0030301     | Abnormality of the anterior commissure           | HP:0002134     | Abnormality of the basal ganglia                                                 |
| 94 | S9       | HP:0011174    | Focal hyperkinetic seizure              | HP:0007359     | Focal-onset seizure                              | HP:0005788     | Abnormal cervical myelogram                                                      |
| 95 | S9       | HP:0012492    | Cerebral artery stenosis                | HP:0002011     | Morphological central nervous system abnormality | HP:0010829     | Impaired temperature sensation                                                   |

| #   | Scenario | Reference HPO | Reference Name                             | Candidate1 HPO | Candidate1 Name                                       | Candidate2 HPO | Candidate2 Name                         |
|-----|----------|---------------|--------------------------------------------|----------------|-------------------------------------------------------|----------------|-----------------------------------------|
| 96  | S10      | HP:0002893    | Pituitary adenoma                          | HP:0010853     | EEG with periodic lateralized epileptiform discharges | HP:0010661     | Absence of the third cerebral ventricle |
| 97  | S10      | HP:0000845    | Growth hormone excess                      | HP:0005341     | Autonomic bladder dysfunction                         | HP:0002470     | Nonprogressive cerebellar ataxia        |
| 98  | S10      | HP:0032656    | Febrile status epilepticus                 | HP:0011145     | Symptomatic seizures                                  | HP:0007097     | Cranial nerve motor loss                |
| 99  | S10      | HP:0001483    | Eye poking                                 | HP:0002073     | Progressive cerebellar ataxia                         | HP:0030180     | Oppenheim reflex                        |
| 100 | S10      | HP:0031097    | Abnormal thyroid-stimulating hormone level | HP:0032914     | Focal aware perseverative automatism seizure          | HP:0025040     | Thalamic edema                          |

**Table S1. List of the 100 trios used for evaluation against expert opinion.**

## 7 Supplementary Method S4

### 7.1 Agreement level calculation

Referring to how we generated the dataset, each expert indicated their prioritization of candidate 1, candidate 2, or none (in case of uncertainty or tie). Thus, the minimum/chance level agreement is when only 5 out of the 13 experts (38.46%) have the same choice. When 6, 7, or 8 experts ( $\leq 61.53\%$ ) agree, we refer to it as “fair-level” agreement. In the case of an agreement between 9 or 10 experts ( $\leq 76.92\%$ ), we categorize the agreement level as “substantial.” Finally, we refer to it as “high-level” agreement if more than 11 experts ( $>76.92\%$ ) agree. **Figure 7B** (in the main manuscript) displays the distribution of agreement levels for the 100 trios.

## 8 Supplementary Table S2

Table S2 contains the frequency and propagated frequency of phenotypic terms in our corpus that have a propagated occurrence of 4 or more (see [Table\\_S2.csv](#)).

## 9 Supplementary Method S5

### 9.1 Time complexity of the patient similarity algorithms in a dynamic setting

Suppose we want to calculate the similarity score between individuals  $P_1$  and  $P_2$ . Let  $P_1$  and  $P_2$  have  $n$  and  $m$  phenotypes, respectively. As a result, we need to calculate phenotypic similarity for  $n \times m$  phenotypic pairs.

Now, assume there is a new diagnosis for  $P_2$  with a newly observed phenotype. When calculating the phenotypic similarity between  $P_1$  and  $P_2$  using  $Sim_{max,Resnik}$ , we need to call the MICA algorithm  $n$  times that has  $O(n \times (E + V))$  time complexity, where  $V$  represents the number of vertices (15,371) and  $E$  represents the number of edges in HPO. The number of edges in a DAG, such as HPO, is of  $O(V^2)$ . This is under the assumption that we have stored all intermediate maximum values calculated in the base case. Otherwise,  $n \times (m + 1)$  calls for MICA would have been needed.

On the other hand, when using  $Sim_{max,Emb}$  in calculating patient similarity with a new phenotype record, we only need to call the cosine similarity algorithm  $n$  times, resulting in a time complexity of  $O(n)$ .



## 10 References

1. Mikolov, T., et al., *Efficient estimation of word representations in vector space*. arXiv preprint arXiv:1301.3781, 2013.
2. Mikolov, T., et al., *Distributed representations of words and phrases and their compositionality*. Advances in neural information processing systems, 2013. **26**.
3. Perozzi, B., R. Al-Rfou, and S. Skiena. *Deepwalk: Online learning of social representations*. in *Proceedings of the 20th ACM SIGKDD international conference on Knowledge discovery and data mining*. 2014.
